# Supplementary material for: Thermogalvanic organohydrogel-based non-contact self-powered electronics for advancing smart agriculture
Source: Royal Society of Chemistry journal article supplement (doi:10.1039/d3tc04133f), 2024-01-01
Supplement: d3tc04133f2.pdf [file d3tc04133f2.pdf]

## Supplementary Information

### Thermogalvanic Organohydrogel-Based Non-Contact Self-Powered Electronics for Advancing Smart Agriculture

Xinru Yang,<sup>a</sup> Zhiyi Zhang,<sup>b</sup> Saeed Ahmed Khan,<sup>c</sup> Lei Sun,<sup>a</sup> Zhaosu Wang,<sup>a</sup> Xiaojing Cui,<sup>d</sup> Zhiquan Huang<sup>\*c</sup> and Hulin Zhang<sup>\*a</sup>

<sup>a</sup>College of Electronic Information and Optical Engineering, Taiyuan University of Technology, Taiyuan, 030024, China

<sup>b</sup>College of Materials Science and Engineering, Taiyuan University of Technology, Taiyuan, 030024, China

<sup>c</sup>Department of Electrical Engineering, Sukkur IBA University, Sukkur 65200, Pakistan

<sup>d</sup>School of Physics and Information Engineering, Shanxi Normal University, Taiyuan 030031, China

<sup>e</sup>School of Mechanical Engineering, Taiyuan University of Science and Technology, Taiyuan, 030024, China

\*To whom correspondence should be addressed: zhiquanhuang@tyust.edu.cn (Z.H.); zhanghulin@tyut.edu.cn (H.Z.)

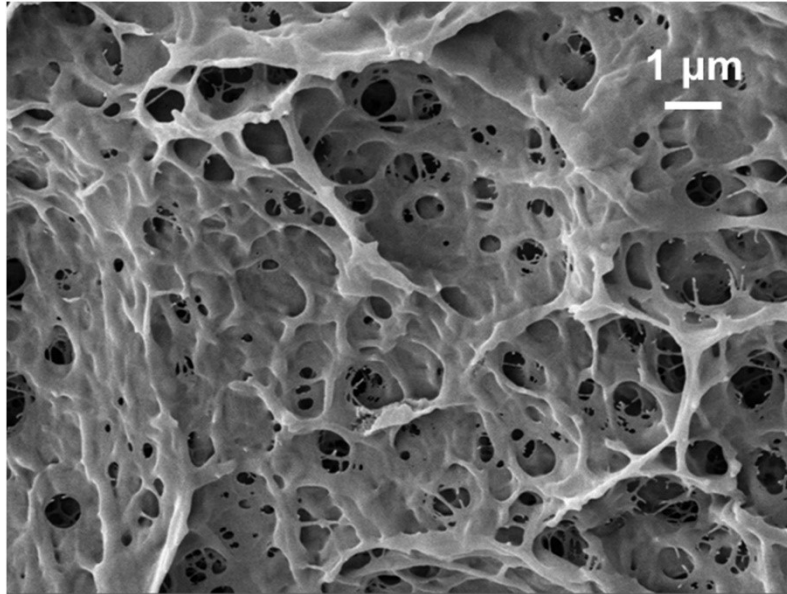

**Fig. S1** SEM image of a PVA gel after freeze-drying (scale bar: 1 μm).

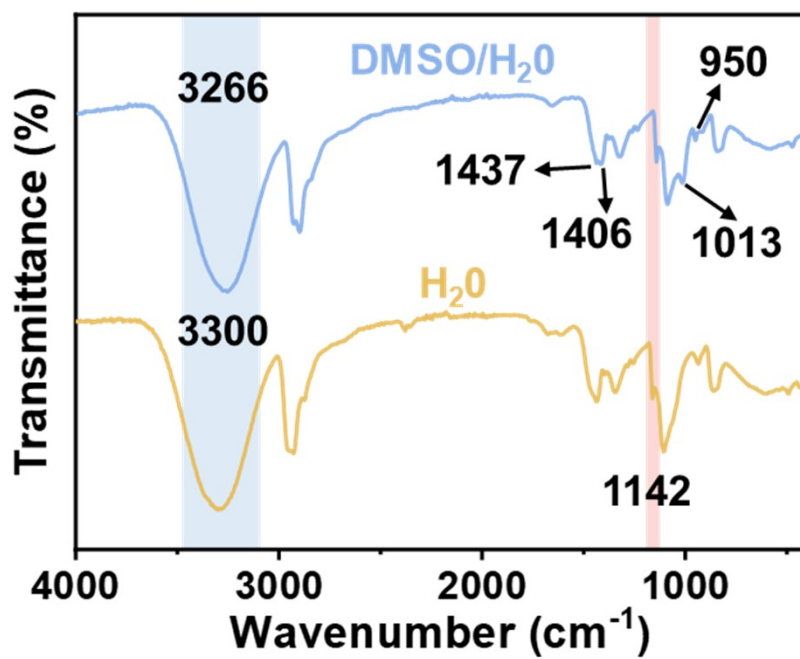

Fig. S2 FTIR spectra of gels with different compositions.

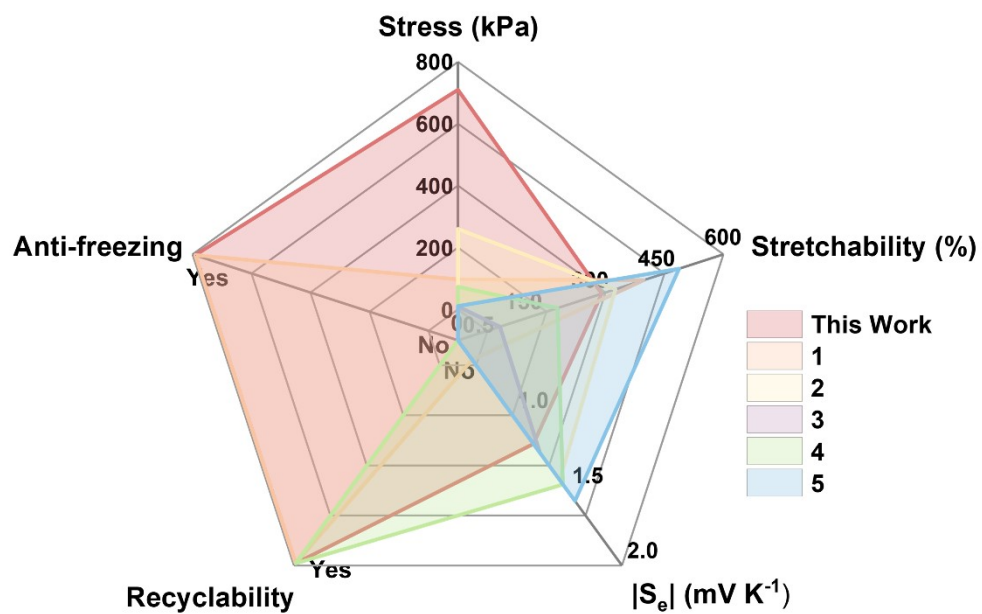

**Fig. S3** A comprehensive comparison between the organohydrogel and the previously reported thermogalvanic hydrogels in terms of the comprehensive properties of Stress (kPa), Stretchability (%), Seebeck coefficient ( $S_e$ ), Recyclability and Anti-freezing.

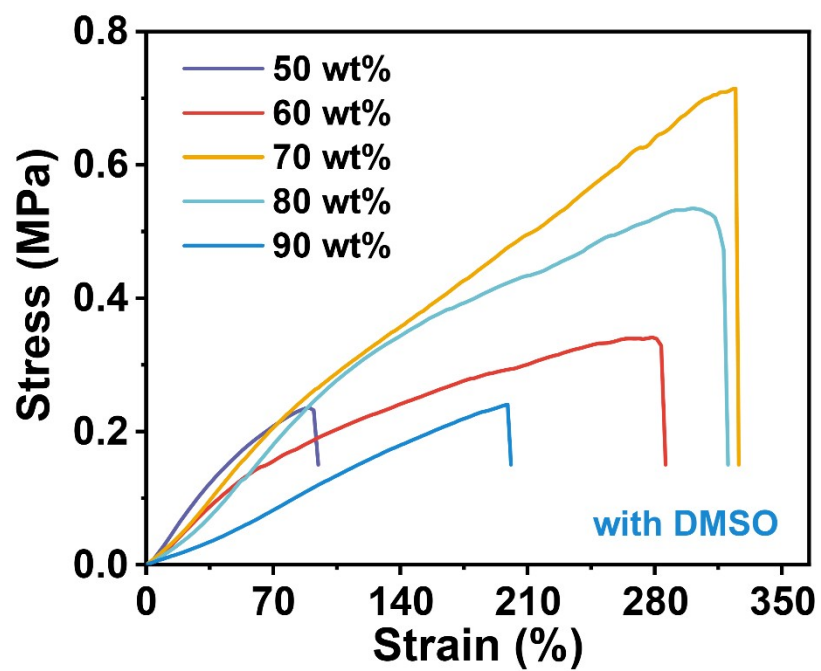

Fig. S4 Stress-Strain curves of the gel with different concentration of the DMSO.

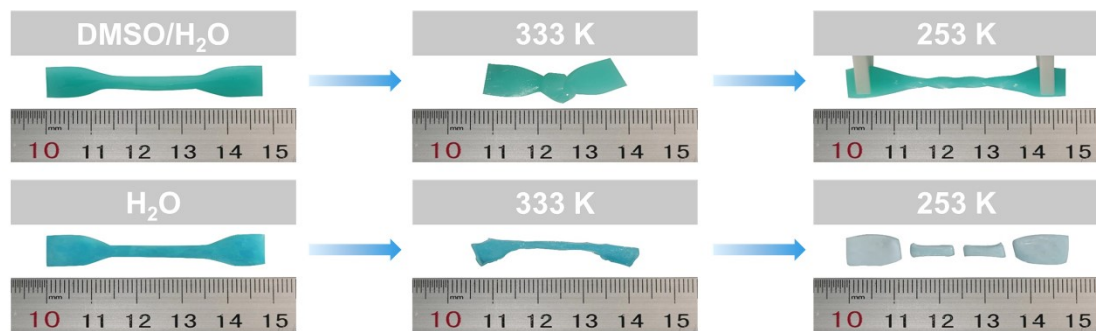

**Fig. S5** Elastic stability of the DMSO/H<sub>2</sub>O and H<sub>2</sub>O hydrogel at 333K and subzero temperatures.

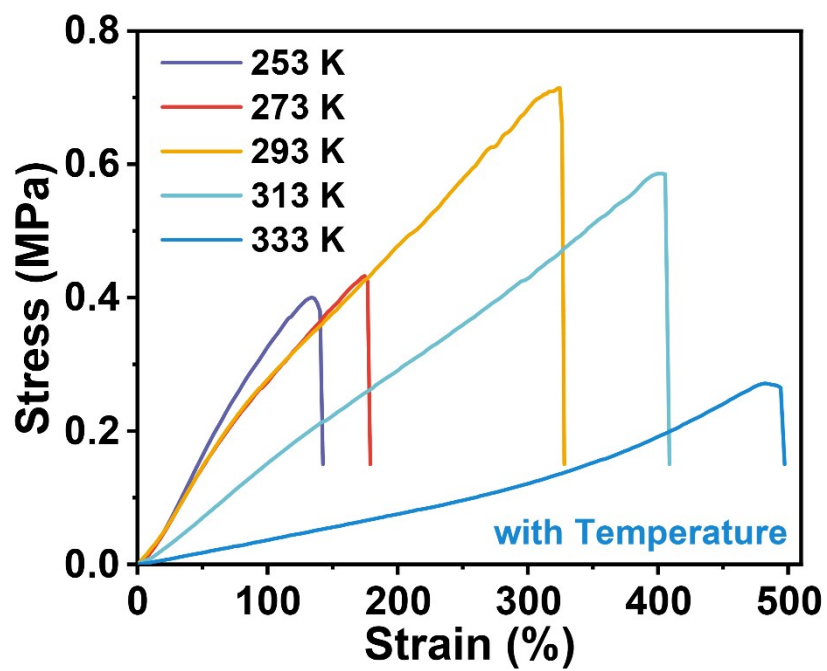

Fig. S6 Stress-Strain curves of the gel under different temperatures.

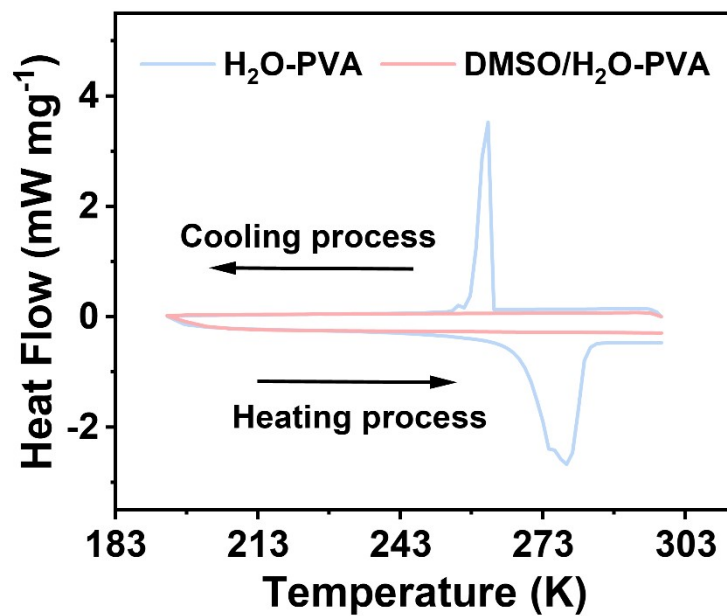

Fig. S7 DSC curves for gels with different compositions.



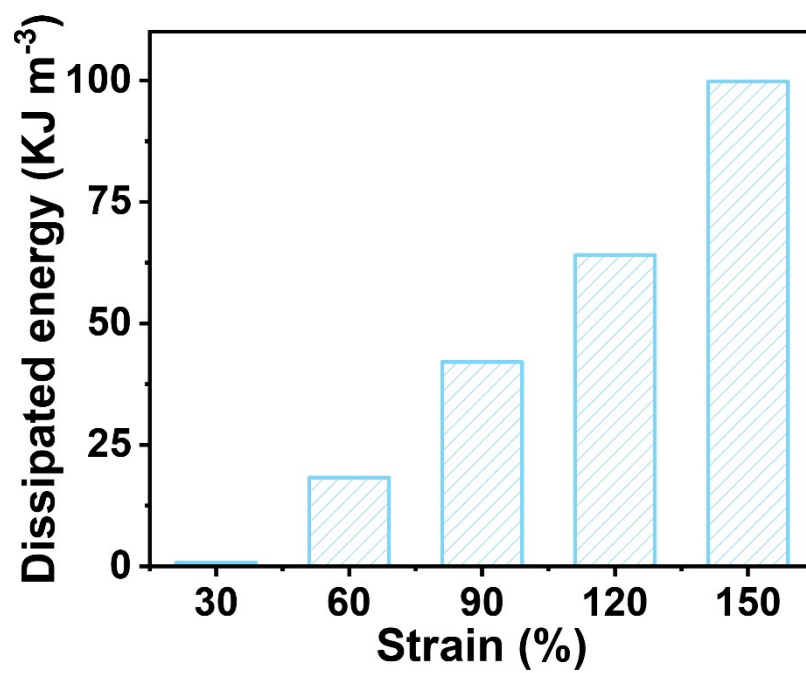

Fig. S8 Dissipated energy values of organohydrogel at different tensile strains.

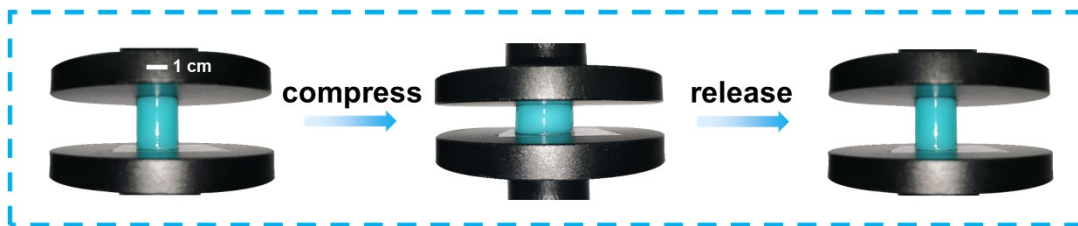

**Fig. S9** Photos showing the organohydrogel excellent compressive and recovery.

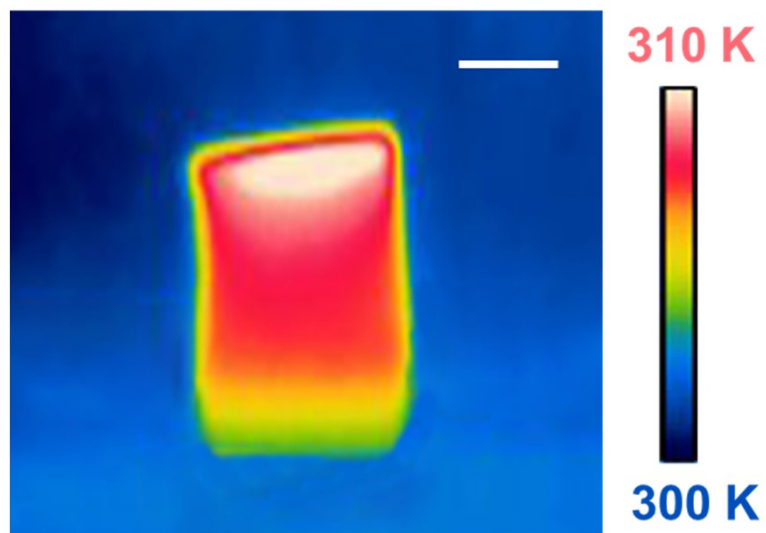

**Fig. S10** Infrared image of an organohydrogel exposed to sunlight for 120s (scale bar: 1cm).

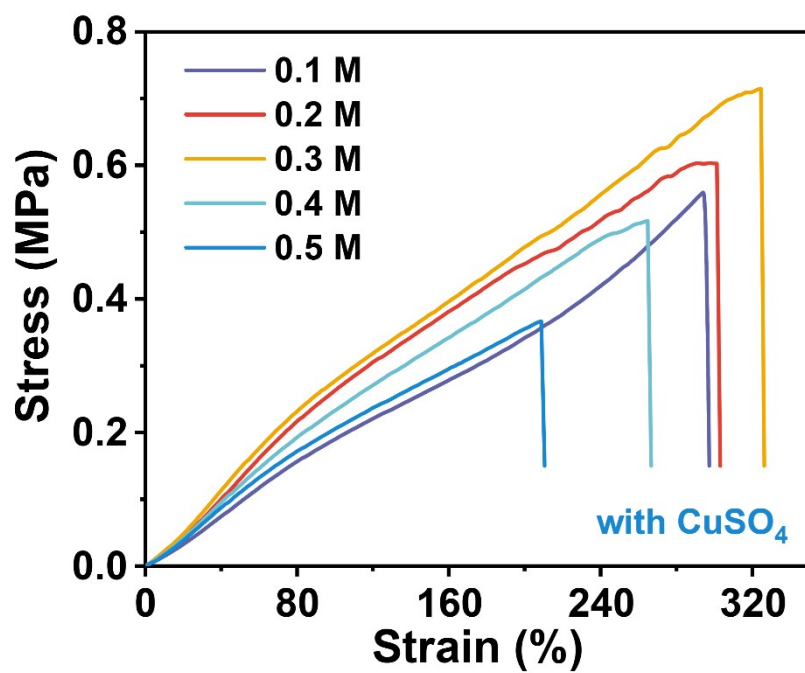

Fig. S11 Stress-Strain curves of the gel with different concentration of the  $\text{CuSO}_4$ .

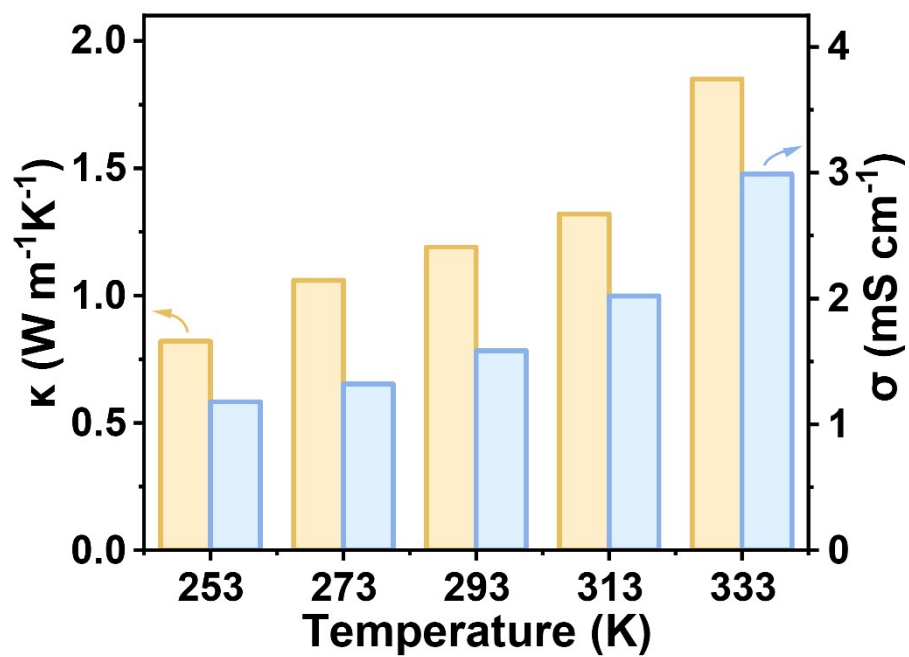

**Fig. S12** Electrical and thermal conductivity of organohydrogel at different temperatures.

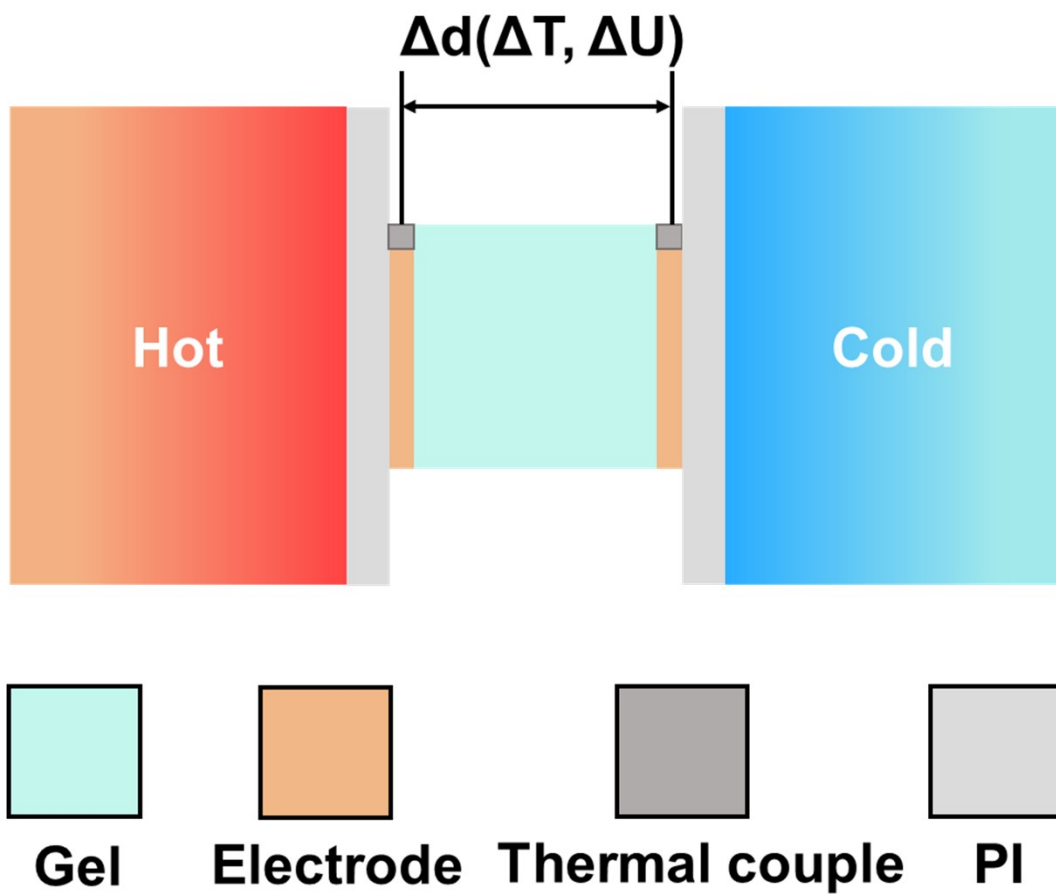

Fig. S13 Schematic image of the platform for thermopower measurements.

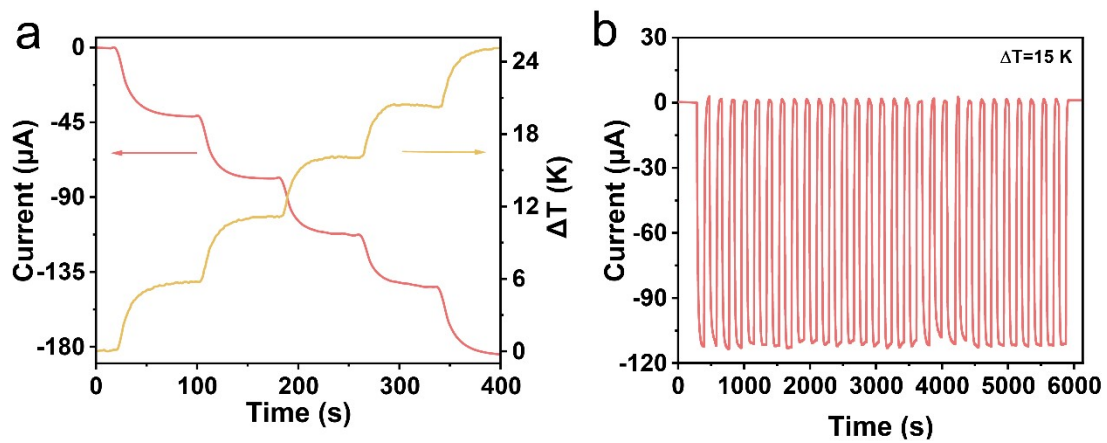

**Fig. S14** (a) Thermal current curve of the thermogalvanic gel at different temperatures.

(b) Thermal currents in organohydrogel subjected to 30 cycles at  $\sim 15$  K temperature difference.

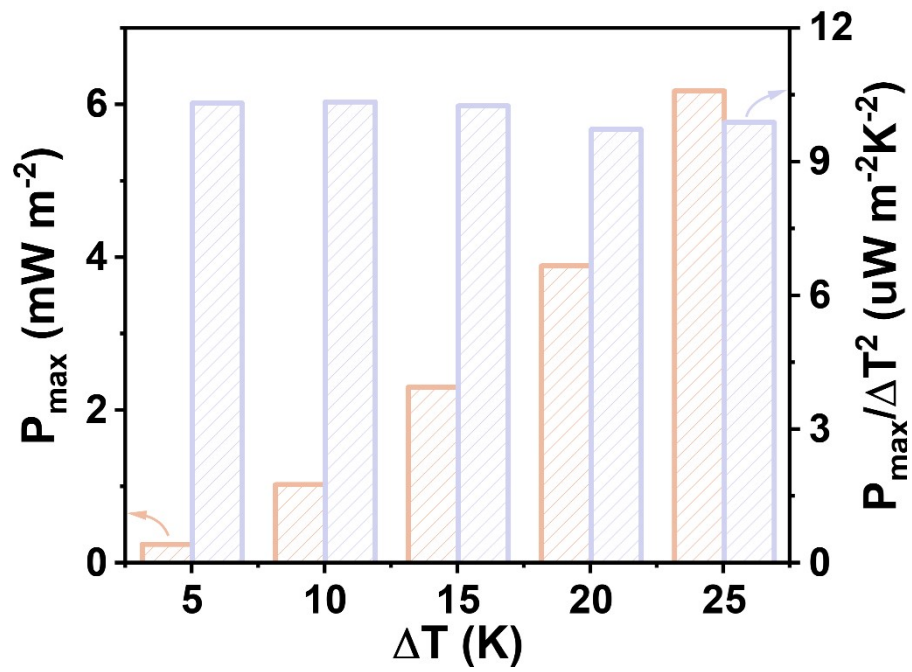

**Fig. S15** The maximum output power density and normalized output power density curves under different  $\Delta T$  values.



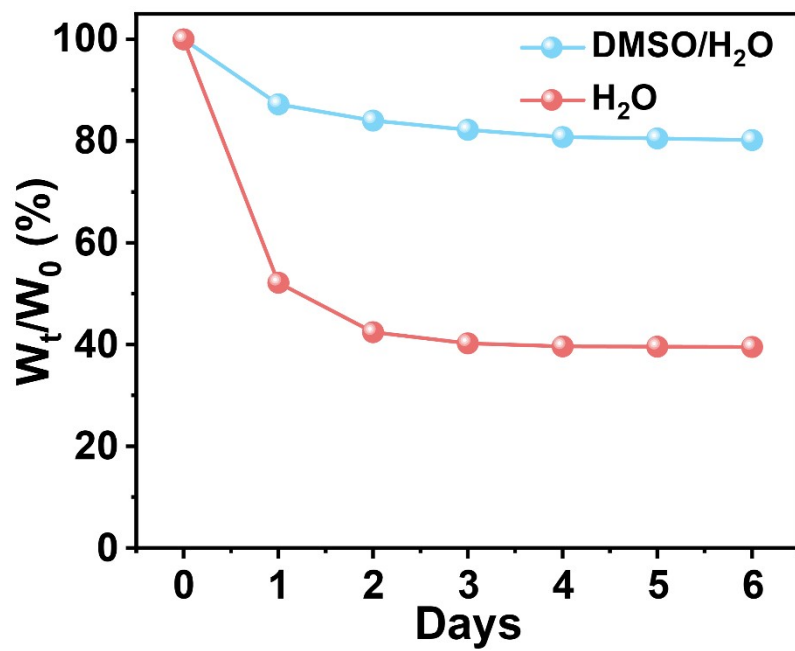

**Fig. S16** Comparison of anti-drying capacity of the DMSO/H<sub>2</sub>O and H<sub>2</sub>O gel over 6 days at room temperature.

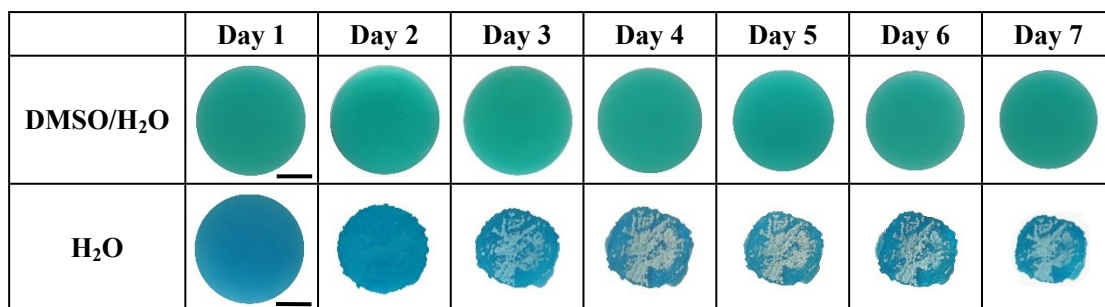

**Fig. S17** Images of the DMSO/H<sub>2</sub>O and H<sub>2</sub>O gel at different different intervals (Scale bar: 1 cm).

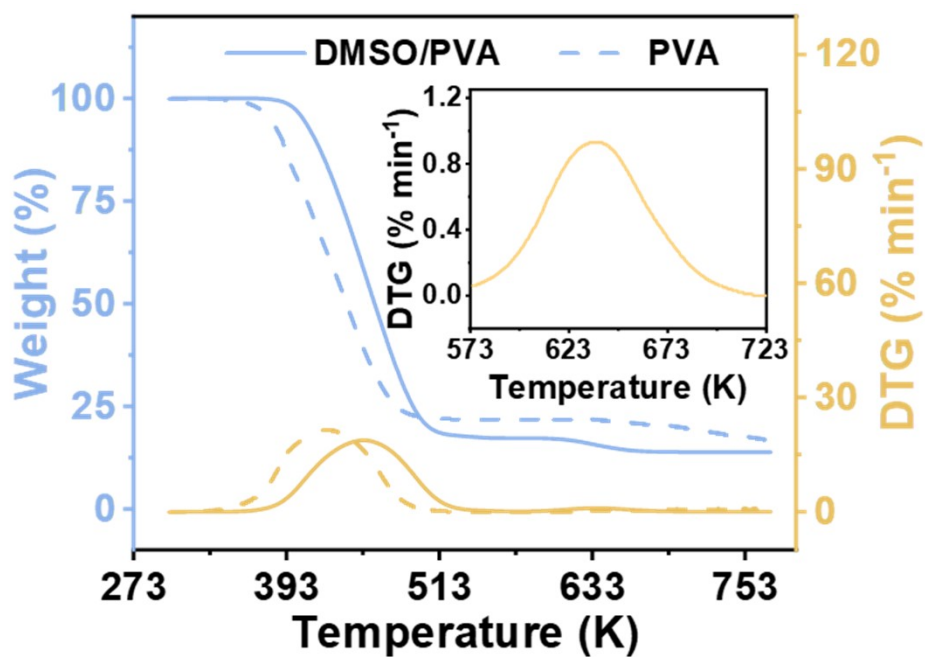

Fig. S18 TG and DTG curves of gels with or without DMSO.

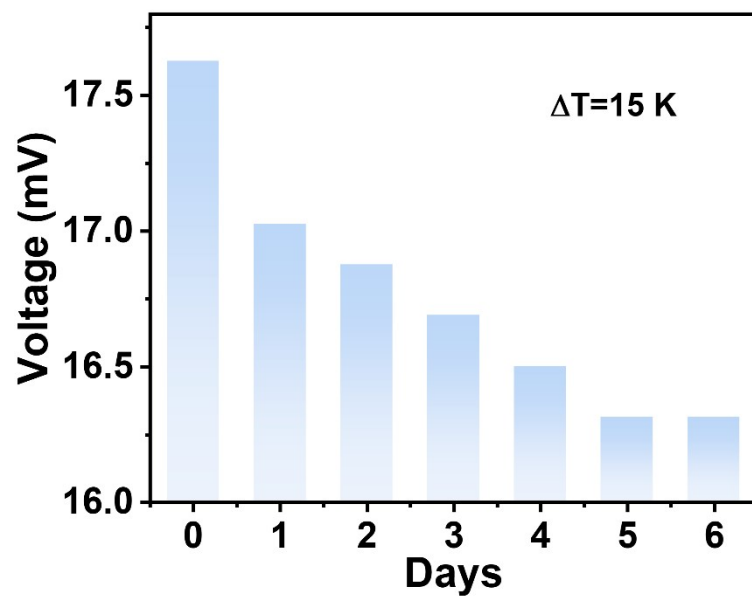

**Fig. S19** Variation of open circuit voltage after being placed in the air for 6 days.

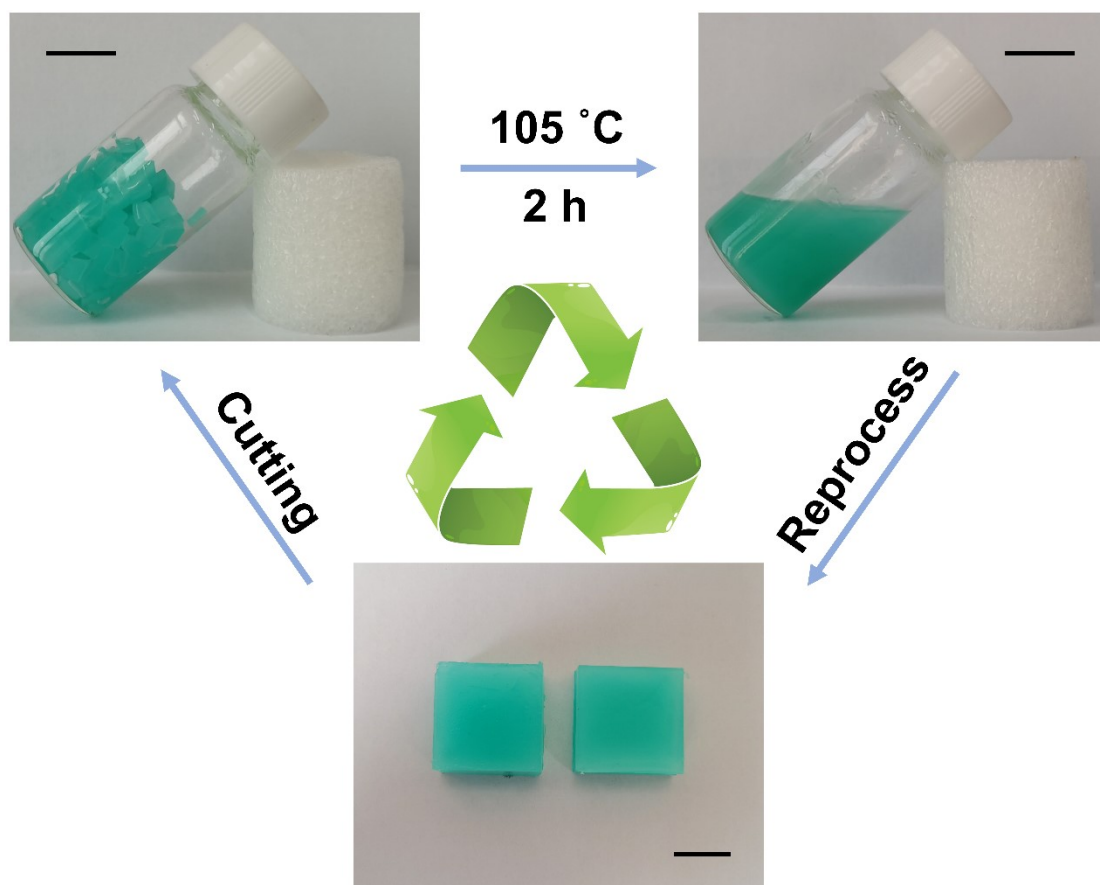

Fig. S20 Recycling process of the organohydrogel. Scale bar 1 cm.

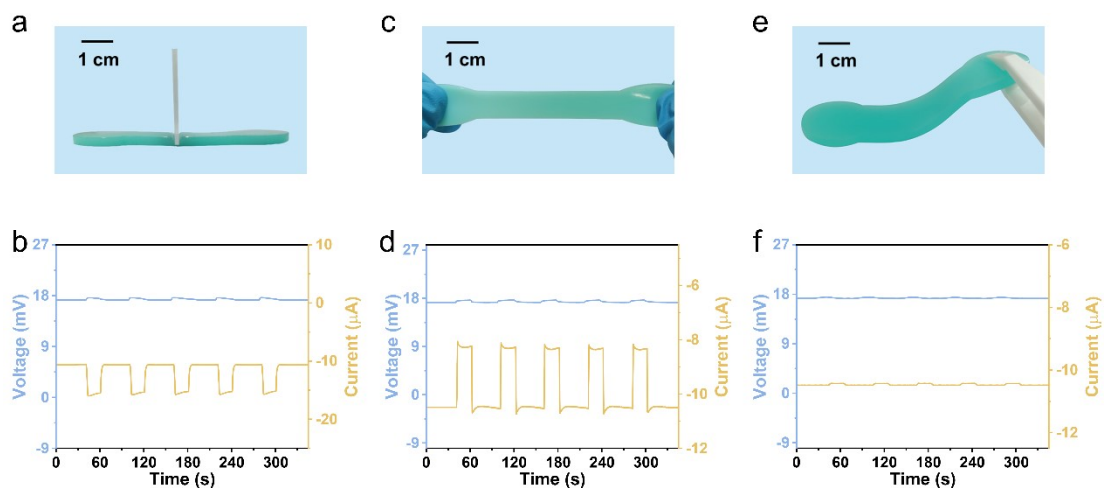

**Fig. S21** (a) A photograph of organohydrogel gel being pressed (scale bar: 10 mm). (b) Voltage-time and current-time curves of the organohydrogel gel being repeatedly pressed when  $T_c = 293$  K and  $T_h = 308$  K. (c) A photograph of organohydrogel gel being stretched (scale bar: 10 mm). (d) Voltage-time and current-time curves of organohydrogel gel being repeatedly stretched when  $T_c = 293$  K and  $T_h = 308$  K. (e) A photograph of organohydrogel gel being repeatedly stretched when  $T_c = 293$  K and  $T_h = 308$  K. (f) Voltage-time and current-time curves of the organohydrogel gel being repeatedly bent when  $T_c = 293$  K and  $T_h = 308$  K.

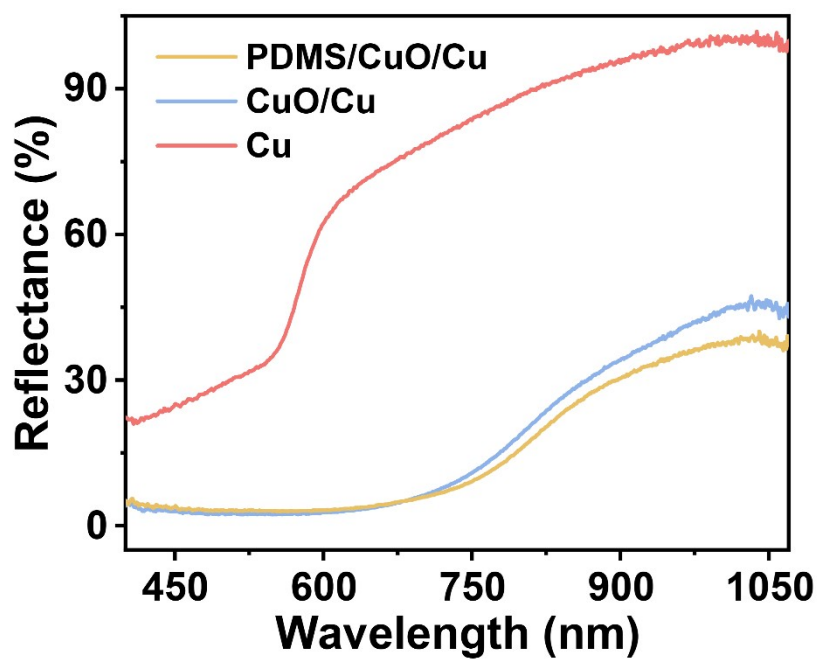

**Fig. S22** UV-vis-NIR reflection spectra of PDMS/CuO/Cu foil, CuO/Cu foil, and Cu foil.

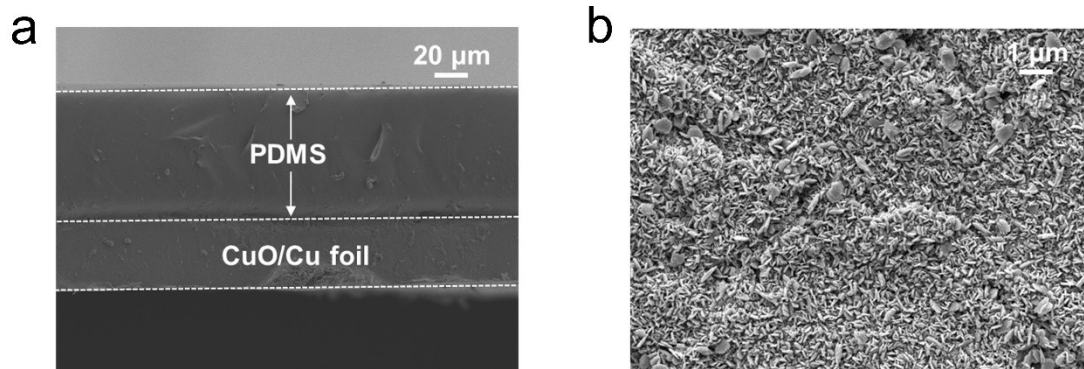

**Fig. S23** (a) Cross-sectional SEM image of PDMS/CuO/Cu foil. (b) SEM image of the CuO micro-/nanostructure in CuO/Cu foil.



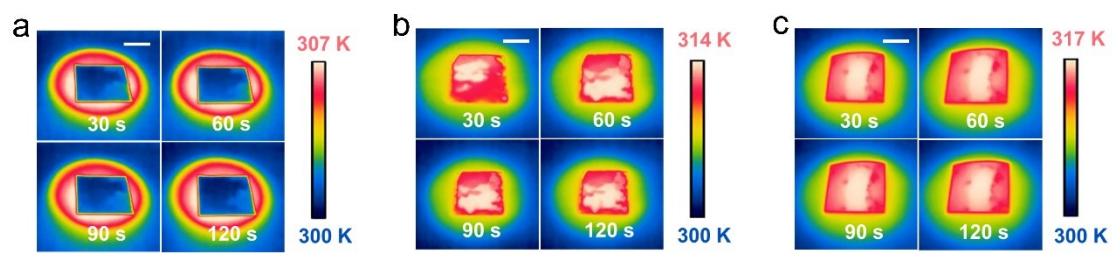

**Fig. S24** Corresponding infrared images over time of the PDMS/CuO/Cu foil, CuO/Cu foil, and Cu foil. (Scale bar: 1 cm)

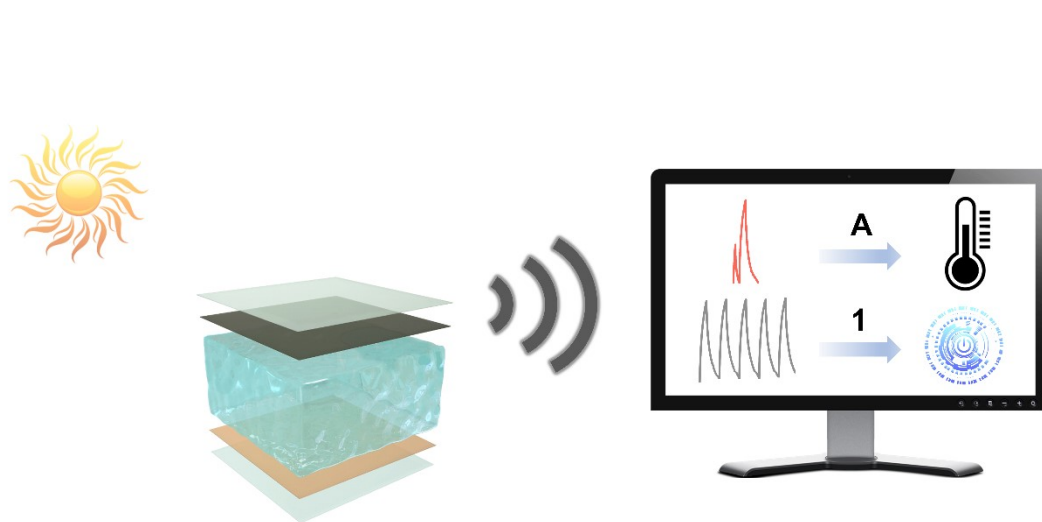

**Fig. S25** Panoramic view of the information interaction with the heat sensor of the organohydrogel based on Morse Code.

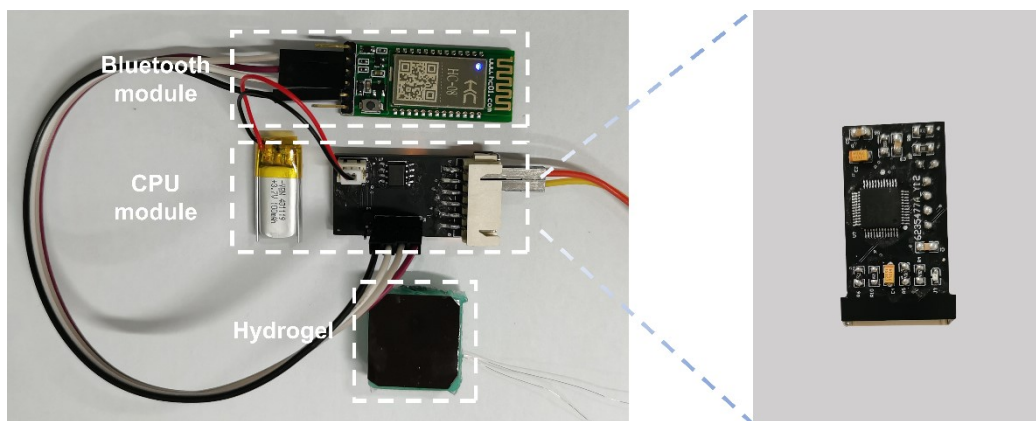

**Fig. S26** Wireless Bluetooth transmission device.

| Morse codes |           |  |   |         |   |             |
|-------------|-----------|--|---|---------|---|-------------|
| A           | • ■       |  | N | ■ •     | 0 | ■ ■ ■ ■ ■ ■ |
| B           | ■ • • •   |  | O | ■ ■ ■   | 1 | • ■ ■ ■ ■ ■ |
| C           | ■ • ■ •   |  | P | • ■ ■ • | 2 | • ■ ■ ■ ■   |
| D           | ■ • •     |  | Q | ■ ■ • ■ | 3 | • • • ■ ■ ■ |
| E           | •         |  | R | • ■ •   | 4 | • • • • ■   |
| F           | • • ■ •   |  | S | • • •   | 5 | • • • • •   |
| G           | ■ ■ •     |  | T | ■       | 6 | ■ • • • •   |
| H           | • • • •   |  | U | • • ■   | 7 | ■ ■ ■ • •   |
| I           | • •       |  | V | • • • ■ | 8 | ■ ■ ■ ■ • • |
| J           | • ■ ■ ■ ■ |  | W | • ■ ■   | 9 | ■ ■ ■ ■ ■ • |
| K           | ■ • ■     |  | X | ■ • • ■ |   |             |
| L           | • ■ • •   |  | Y | ■ • ■ ■ |   |             |
| M           | ■ ■       |  | Z | ■ ■ • • |   |             |

Fig. S27 International Morse Code table.

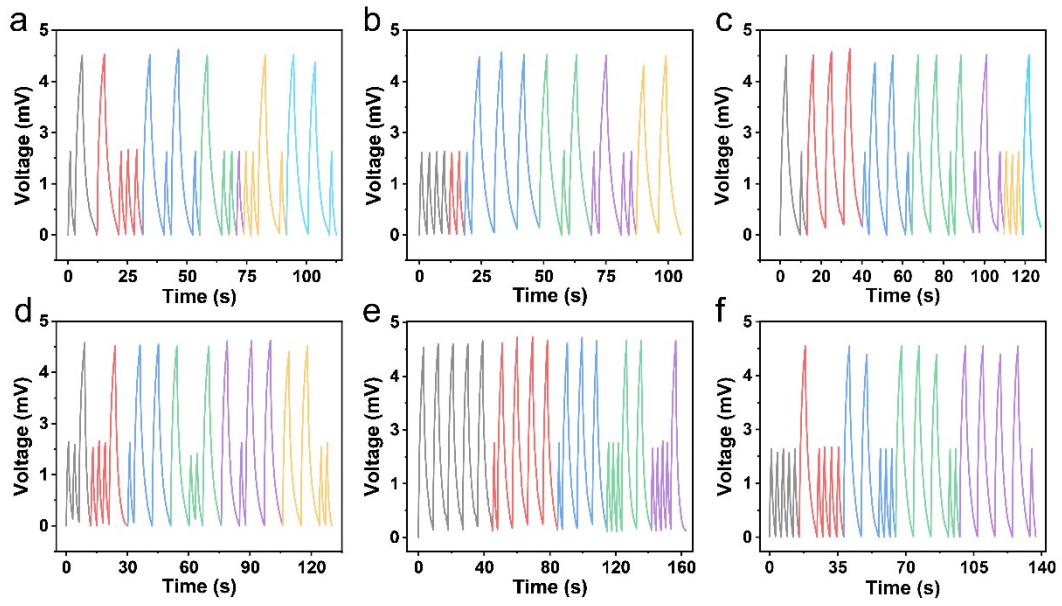

**Fig. S28** All letters in the international Morse Code table are indicated. (a) A-G, (b) H-M, (c) N-T, (d) U-Z, (e) 0-4, (f) 5-9.

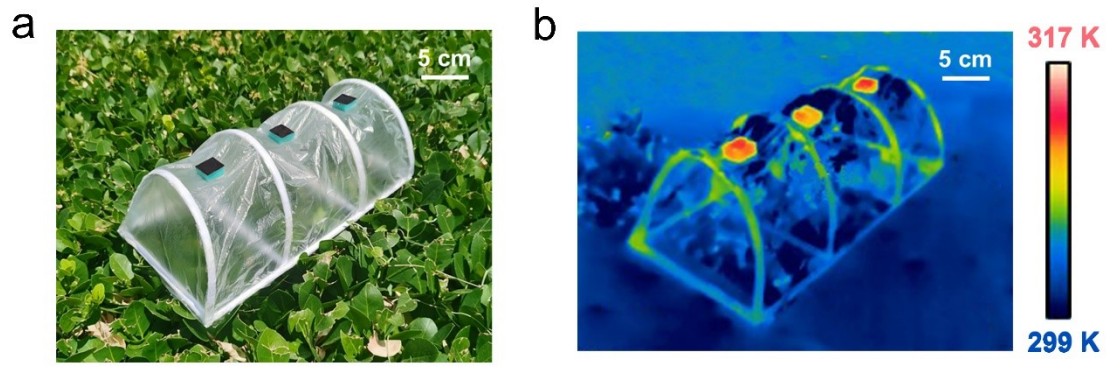

**Fig. S29** (a) Photos of the greenhouse model. (b) Infrared image of the greenhouse model.

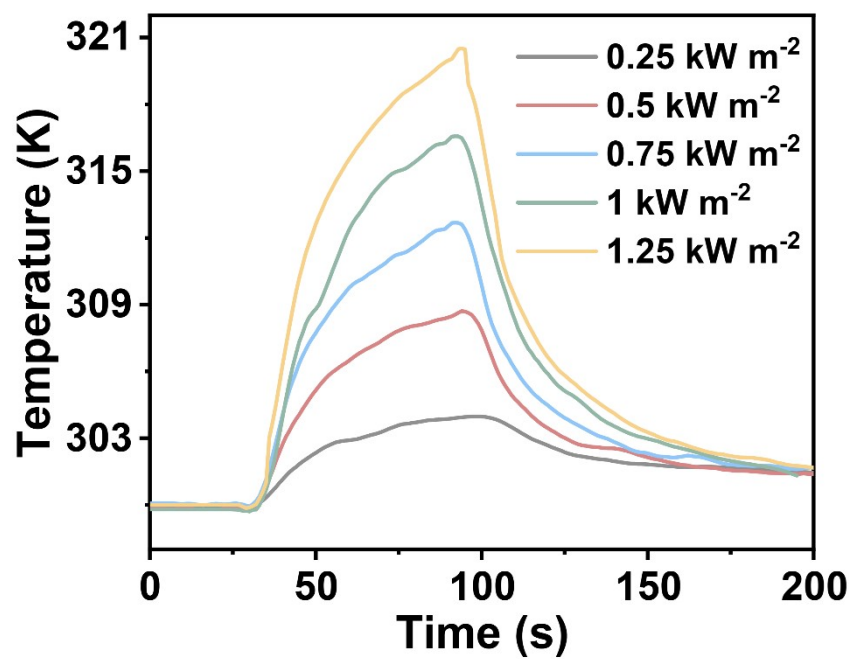

Fig. S30 PDMS/CuO/Cu foil temperature at different optical densities.

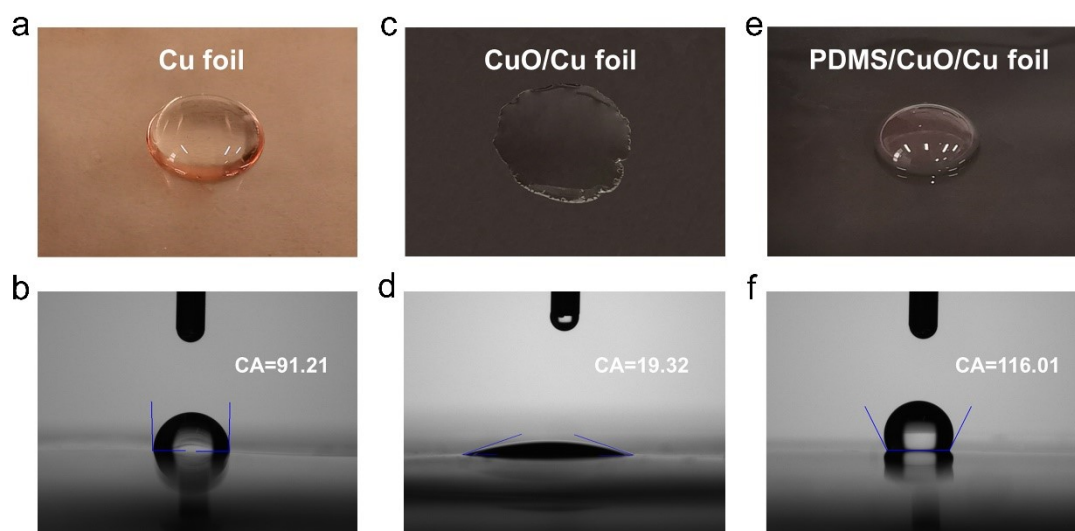

**Fig. S31** Photographs of the contact angle tests for hydrophilic and hydrophobic features of Cu foil (a, b), CuO/Cu foil (c, d), and PDMS/CuO/Cu foil (e, f).



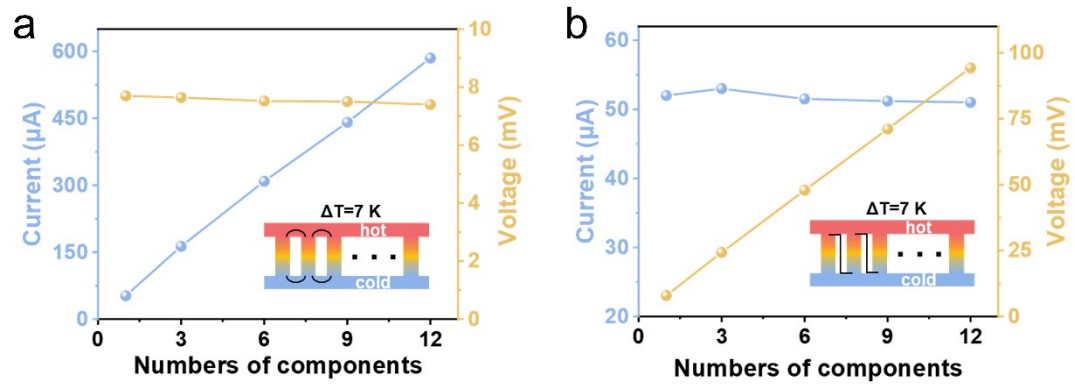

**Fig. S32** Output current and output voltage of different number of integrated devices

(a) in parallel and (b) in series.

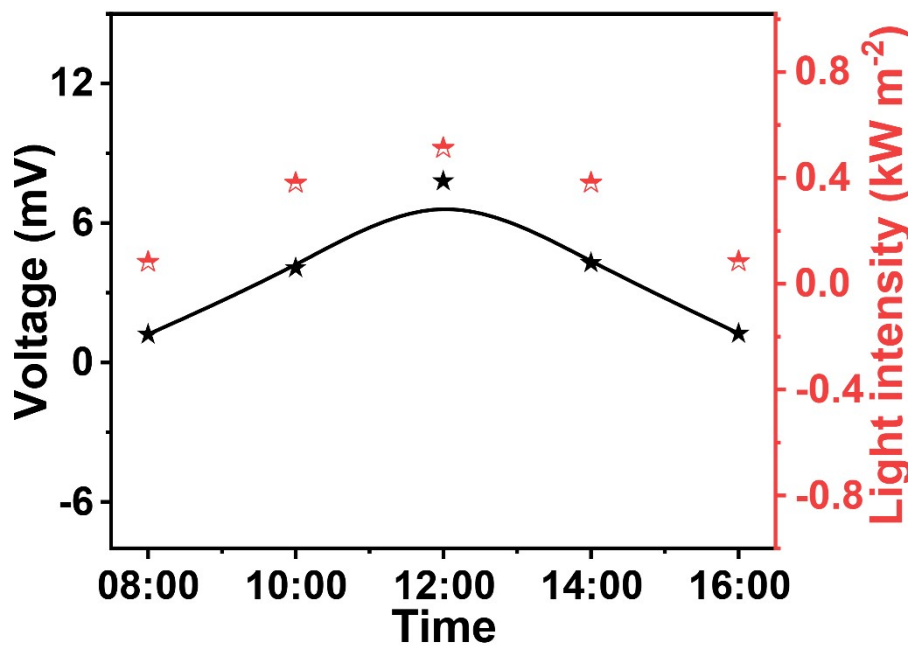

Fig. S33 Output voltage and winter light intensity changing throughout a day.

| Stress (kPa) | Stretchability (%) | $ S_e $ (mV K <sup>-1</sup> ) | Recyclability | Anti-freezing | Ref.      |
|--------------|--------------------|-------------------------------|---------------|---------------|-----------|
| 710          | 325                | 1.19                          | Yes           | Yes           | This work |
| 97           | 420                | 0.63                          | Yes           | Yes           | 1         |
| 260          | 356                | 1.43                          | No            | No            | 2         |
| 9            | 95                 | 1.25                          | No            | No            | 3         |
| 73           | 225                | 1.46                          | Yes           | No            | 4         |
| 10.5         | 500                | 1.57                          | No            | No            | 5         |

Table S1. A comprehensive comparison between the organohydrogel and the previously reported thermogalvanic hydrogels in terms of the comprehensive properties of stress (kPa), stretchability (%), Seebeck coefficient ( $S_e$ ), recyclability and anti-freezing.

| Absorber materials        | Electricity type                                  | Solar Intensity (kW m <sup>-2</sup> ) | Solar thermal conversion efficiency (%) | Cost (\$) | Ref.      |
|---------------------------|---------------------------------------------------|---------------------------------------|-----------------------------------------|-----------|-----------|
| PDMS/CuO /Cu              | Thermogalvanic (Cu/Cu <sup>2+</sup> )             | 1                                     | 77.3                                    | 0.1       | This work |
| Graphite /nonwoven film   | Thermoelectric (Bi <sub>2</sub> Te <sub>3</sub> ) | 8                                     | 72.2                                    | 22.1      | 6         |
| Nitrogen enriched carbon  | Piezoelectric (PVDF)                              | 1                                     | 90                                      | 17        | 7         |
| CNT modified filter paper | Ionvoltaic(Nafion membrane)                       | 1                                     | 75                                      | 12        | 8         |
| r-GO coated fiber         | Photovoltaic (Polysilicon)                        | 1                                     | 74.6                                    | 1.1       | 9         |
| graphene oxide (rGO)      | Piezoelectric (PVDF-TrFE)                         | 1                                     | 80                                      | 15        | 10        |

Table S2. Summary of the absorber materials, electricity type, solar intensity, and cost reported and this work.

**Photothermal conversion efficiency calculation.**<sup>11</sup> The overall steam generation efficiency ( $\eta$ ) can be calculated using the Equation (1).

Equation (1):

$$\eta = (\dot{m}h_{LV})/q_i$$

Where  $\dot{m}$  is the solar-driven evaporation rate of water under solar illumination,  $q_i$  is the incident power density of solar illumination in process of steam generation experiment, and  $h_{LV}$  made up of the sensible heat and the enthalpy of vaporization is calculated using the Equation (2).

Equation (2):

$$h_{LV} = C\Delta T + \Delta h$$

Where  $C$  is the specific heat capacity of water and a constant of  $4.18 \text{ J g}^{-1}\text{K}^{-1}$ ,  $\Delta T$  is the temperature increase of water, and  $\Delta h$  is the enthalpy of vaporization on the relative temperature.

Supplemental references:

- 1 X. Li, X. Xiao, C. Bai, M. Mayer, X. Cui, K. Lin, Y. Li, H. Zhang and J. Chen, J. Mater. Chem. C, 2022, **10**, 13789-13796.
- 2 P. Peng, J. Zhou, L. Liang, X. Huang, H. Lv, Z. Liu and G. Chen, Nano-Micro Lett., 2022, **14**, 81.
- 3 Y. Zhou, S. Zhang, M. A. Buckingham, L. Aldous, S. Beirne, C. Wu, Y. Liu, G. Wallace and J. Chen, Chem. Eng. J., 2022, **449**, 137775.
- 4 H. Yang, S. Ahmed Khan, N. Li, R. Fang, Z. Huang and H. Zhang, Chem. Eng. J., 2023, **473**, 145247.
- 5 J. Shen, Y. Ma, C. Yang, S. Liu, J. Li, Z. Chen, B. Tian and S. Li, J. Mater. Chem. A, 2022, **10**, 7785-7791.
- 6 X. Li, X. Min, J. Li, N. Xu, P. Zhu, B. Zhu, S. Zhu and J. Zhu, Joule, 2018, **2**, 2477-2484.
- 7 L. Zhu, M. Gao, C. K. N. Peh, X. Wang and G. W. Ho, Adv. Energy Mater., 2018, **8**, 1702149.
- 8 P. Yang, K. Liu, Q. Chen, J. Li, J. Duan, G. Xue, Z. Xu, W. Xie and J. Zhou, Energy Environ. Sci., 2017, **10**, 1923-1927.
- 9 N. Xu, P. Zhu, Y. Sheng, L. Zhou, X. Li, H. Tan, S. Zhu and J. Zhu, Joule, 2020, **4**, 347-358.
- 10 S. Meng, C. Tang, J. Yang, M. Yang and W. Yang, Adv. Sci., 2022, **9**, 2204187.
- 11 F. L. Meng, M. Gao, T. Ding, G. Yilmaz, W. L. Ong and G. W. Ho, Adv. Funct. Mater., 2020, **30**, 2002867.
